# Supplementary material
Source: PubMed Central journal article supplement (PMC6842090)
Supplement: NIHMS1531108-supplement-2.pdf [file NIHMS1531108-supplement-2.pdf]

**Table S1. PCR and qPCR primers**

---

| <u>Regular PCR primers</u>    |                                                    |
|-------------------------------|----------------------------------------------------|
| circAR-E2 forward             | 5'-GGAAGCTGCAAGGTCTTCTT                            |
| circAR-E2 reverse             | 5'-AGATCAGGCAGGTCTTCT                              |
| circAR-E2In1 forward          | 5'- GAATAACACCCAGCCAAGAG                           |
| circAR-E2In1 reverse          | 5'- AGATCAGGCAGGTCTTCT                             |
| circAR-E2In2 forward          | 5'-CCAGCTGAGAGAGTGTACTA                            |
| circAR-E2In2 reverse          | 5'-AGATCAGGCAGGTCTTCT                              |
| circAR-E3 forward             | 5'-TTGTCCATCTTGTCTCTTC                             |
| circAR-E3 reverse             | 5'-CGCACAGGTA CTTCTGTTTC                           |
| AR-V7 forward                 | 5'-TCATTTTGAGATGCTTGCAATTG                         |
| AR-V7 reverse                 | 5'- TGTCGTCTTCGGAAATGTTATGA                        |
| RPL30 forward                 | 5'- TGAAGATGATCAGACAAGGCAA                         |
| RPL30 reverse                 | 5'- CACCAGTTTTAGCCAACATAGC                         |
| <u>qPCR primer-probe sets</u> |                                                    |
| RPL30 forward                 | 5'-TGAAGATGATCAGACAAGGCAA                          |
| RPL30 reverse                 | 5'-CACCAGTTTTAGCCAACATAGC                          |
| RPL30 probe                   | 5'-/56-FAM/TTCTCGCTA/ZEN/ACA ACTGCC CAGCT/3IABkFQ/ |
| circAR-E2 forward             | 5'-GGAAGCTGCAAGGTCTTCTT                            |
| circAR-E2 reverse             | 5'-AGATCAGGCAGGTCTTCT                              |
| circAR-E2 probe               | 5'-/56-FAM/AAGAGCCGC/ZEN/TGAAGTTTGGAGACT/3IABkFQ/  |
| circAR-E2In1 forward          | 5'-GAATAACACCCAGCCAAGAG                            |
| circAR-E2In1 reverse          | 5'-AGATCAGGCAGGTCTTCT                              |
| circAR-E2In1 probe            | 5'-/56-FAM/CATCTTTGG/ZEN/AGACTGCCAGGGACC/3IABkFQ/  |
| circAR-E2In2 forward          | 5'-CCAGCTGAGAGAGTGTACTA                            |
| circAR-E2In2 reverse          | 5'-AGATCAGGCAGGTCTTCT                              |
| circAR-E2In2 probe            | 5'-/56-FAM/TCATTGCTG/ZEN/GTTTGGAGACTGCCA/3IABkFQ/  |
| circAR-E3 forward             | 5'-TTGTCCATCTTGTCTCTTC                             |
| circAR-E3 reverse             | 5'-CGCACAGGTA CTTCTGTTTC                           |
| circAR-E3 probe               | 5'-/56-FAM/ATGAAGCAG/ZEN/GGATGACTCTGGGAG/3IABkFQ/  |
| AR-FL forward                 | 5'-GAAAGTCCACGCTCACCAT                             |
| AR-FL reverse                 | 5'-AATCCCACATCCTGCTCAAG                            |
| AR-FL probe                   | 5'-/56-FAM/TGATGCAGC/ZEN/TCTCTCGCAATAGGC/3IABkFQ/  |
| AR-V3 forward                 | 5'-TTCTGGGTGTCACTATGGAG                            |
| AR-V3 reverse                 | 5'-GGGTTAGTGTCTGATTATGATTCTT                       |
| AR-V3 probe                   | 5'-/56-FAM/TGTGGAAGC/ZEN/TGCAAGGTCTTCTTCA/3IABkFQ/ |
| AR-V7 forward                 | 5'-TCATTTTGAGATGCTTGCAATTG                         |
| AR-V7 reverse                 | 5'-TGTCGTCTTCGGAAATGTTATGA                         |
| AR-V7 probe                   | 5'-/56-FAM/AGCAGGGAT/ZEN/GACTCTGGGAGAAA/3IABkFQ/   |
| AR-V9 forward                 | 5'-TGTTATGAAGCAGGGATGACTC                          |
| AR-V9 reverse                 | 5'-GCTGAAGGCTCTACCGATTT                            |
| AR-V9 probe                   | 5'-/56-FAM/TGGGAGACA/ZEN/ACTTACCTGAGCAAGC/3IABkFQ/ |
| 45S forward                   | 5'-CCTCGCTGCGATCTATTGAAA                           |
| 45S reverse                   | 5'-AGGAAGACGAACGGAAGGAC                            |
| 45S probe                     | 5'-/56-FAM/TCAGCCCTC/ZEN/GACACAAGGGTTTG/3IABkFQ/   |

---
