# Supplementary material
Source: PubMed Central journal article supplement (PMC6842090)
Supplement: NIHMS1531108-supplement-3.pdf [file NIHMS1531108-supplement-3.pdf]

**Table S2. AR backsplice junctions in circRNA databases**

| Databases                                                            | Chr      | Start    | End      | Gene  | ExonStart-ExonEnd      | Samples                  |
|----------------------------------------------------------------------|----------|----------|----------|-------|------------------------|--------------------------|
| MiOncoCirc (Josh NV <i>et al.</i> , 2019)                            | chrX     | 67711401 | 67717622 | AR    | E4-E5                  | PRAD                     |
|                                                                      | chrX     | 67643255 | 67686126 | AR    | E2-E3                  | VCaP, PRAD, BRCA, LMSARC |
|                                                                      | chrX     | 67643255 | 67643407 | AR    | E2                     | VCaP, PRAD, BRCA, THCA   |
|                                                                      | chrX     | 67711401 | 67711689 | AR    | E4                     | VCaP, PRAD, BRCA         |
|                                                                      | chrX     | 67686009 | 67711689 | AR    | E3-E4                  | VCaP, PRAD, BRCA         |
|                                                                      | chrX     | 67711401 | 67722984 | AR    | E4-E7                  | PRAD                     |
|                                                                      | chrX     | 67680719 | 67686126 | AR    | CE4-E3                 | 22Rv1, PRAD              |
|                                                                      | chrX     | 67643255 | 67711689 | AR    | E2-E4                  | VCaP, PRAD               |
|                                                                      | chrX     | 67717477 | 67721963 | AR    | E5-E6                  | Unknown                  |
|                                                                      | chrX     | 67686009 | 67686126 | AR    | E3                     | 22Rv1, PRAD              |
|                                                                      | chrX     | 67643255 | 67681003 | AR    | E2-CE4                 | Unknown                  |
|                                                                      | chrX     | 67643255 | 67717622 | AR    | E2-E5                  | PRAD                     |
|                                                                      | chrX     | 67686009 | 67717622 | AR    | E3-E5                  | VCaP                     |
|                                                                      | chrX     | 67685940 | 67686126 | AR    | Intron2-E3             | Unknown                  |
|                                                                      | chrX     | 67686009 | 67721963 | AR    | E3-E6                  | Unknown                  |
|                                                                      | chrX     | 67643255 | 67722984 | AR    | E2-E7                  | PRAD                     |
| chrX                                                                 | 67711401 | 67721963 | AR       | E4-E6 | Unknown                |                          |
| CIRCpedia (Rui D <i>et al.</i> , 2018)                               | chrX     | 67643255 | 67643407 | AR    | E2                     | Hs68, HUVEC, H9, A549    |
|                                                                      | chrX     | 67643255 | 67686126 | AR    | E2-E3                  | A549, Liver              |
|                                                                      | chrX     | 67686009 | 67686126 | AR    | E3                     | H1, Liver                |
|                                                                      | chrX     | 67686009 | 67711689 | AR    | E3-E4                  | Liver                    |
|                                                                      | chrX     | 67711401 | 67711689 | AR    | E4                     | Liver                    |
|                                                                      | chrX     | 67711401 | 67722984 | AR    | E4-E8                  | Liver                    |
| circBase (Glažar P <i>et al.</i> , 2014)                             | chrX     | 67568840 | 67730619 | AR    | Inside Intron1-E8      | H1hesc                   |
|                                                                      | chrX     | 67643255 | 67643407 | AR    | E2                     | HUVEC                    |
|                                                                      | chrX     | 67643255 | 67717622 | AR    | E2-E5                  | H1-hESC                  |
|                                                                      | chrX     | 67686009 | 67686126 | AR    | E3                     | H1-hESC                  |
| cancer-specific circRNA database (CSCD) (Xia S <i>et al.</i> , 2018) | chrX     | 67686009 | 67711689 | AR    | E3-E4                  | SJCRH30, SJSA1           |
|                                                                      | chrX     | 67728422 | 67729278 | AR    | Inside exon 8          | A549                     |
|                                                                      | chrX     | 67725204 | 67725536 | AR    | Inside exon 8          | HT1080                   |
|                                                                      | chrX     | 67553838 | 67647006 | AR    | Inside Intron1-Intron2 | RPMI-7951                |
| circRNADb (Chen X <i>et al.</i> , 2016)                              | chrX     | 67643255 | 67643407 | AR    | E2                     | H9 hESCs                 |
| CirInteractome (Dudekula DB <i>et al.</i> , 2016)                    | chrX     | 67568840 | 67730619 | AR    | Inside Intron1-E8      | H1-hESC                  |
|                                                                      | chrX     | 67643255 | 67643407 | AR    | E2                     | HUVEC                    |
|                                                                      | chrX     | 67643255 | 67717622 | AR    | E2-E5                  | H1-hESC                  |
|                                                                      | chrX     | 67686009 | 67686126 | AR    | E3                     | H1-hESC                  |

PRAD: prostate adenocarcinoma; BRCA: breast carcinoma; LMSARC: Leiomyosarcoma; THCA: thyroid gland medullary carcinoma; other samples: cell lines or liver
